# Supplementary material for: The first examples of triply bonded dirhenium(II,II) complexes that contain bis(diphenylphosphino)methane and dithiocarbamato ligands: spectroscopic, structural, cytotoxicity and computational studies
Source: Royal Society of Chemistry journal article supplement (doi:10.1039/c9nj06122c), 2020-01-01
Supplement: c9nj06122c1.pdf [file c9nj06122c1.pdf]

## Supporting Information

for

**The first examples of triply bonded dirhenium(II,II) complexes that contain bis(diphenylphosphino)methane and dithiocarbamate ligands: spectroscopic, structural, cytotoxicity and computational studies**

**Suman Mandal,<sup>a</sup> Suman Mallick,<sup>a</sup> Purnananda Garu,<sup>a</sup> Jagannath Chowdhury,<sup>a</sup> Asmita Samadder,<sup>b</sup> Jayeeta Das,<sup>b</sup> Anisur Rahman Khuda-Bukhsh,<sup>b</sup> and Swarup Chattopadhyay<sup>\*,a</sup>**

<sup>a</sup>*Department of Chemistry, University of Kalyani, Kalyani, Nadia 741235, WB, India. Tel.: +91 33 25828750; Fax: +91 33 25828282. E-mail: icskc@klyuniv.ac.in (S. Chattopadhyay)*

<sup>b</sup>*Department of Zoology, University of Kalyani, Kalyani, Nadia 741235, India*

\*e-mail: icskc@klyuniv.ac.in

### Contents of Supporting Information

**Fig. S1:** IR spectrum of **2**(L<sub>Me</sub>).

**Fig. S2:** IR spectrum of **2**(L<sub>Et</sub>).

**Fig. S3:** IR spectrum of **2**(L<sub>PyT</sub>).

**Fig. S4:** <sup>1</sup>H NMR spectrum of **2**(L<sub>Me</sub>).

**Fig. S5:** <sup>1</sup>H NMR spectrum of **2**(L<sub>Et</sub>).

**Fig. S6:** <sup>1</sup>H NMR spectrum of **2**(L<sub>PyT</sub>).

**Fig. S7:** ESI Mass spectrum of **2**(L<sub>Me</sub>)

**Fig. S8:** ESI Mass spectrum of **2**(L<sub>Et</sub>)

**Fig. S9:** ESI Mass spectrum of **2**(L<sub>PyT</sub>)

**Fig. S10:** Isodensity plot of frontier molecular orbitals of **2**(L<sub>Me</sub>) with isodensity value 0.04.

**Fig. S11:** Isodensity plot of frontier molecular orbitals of **2**(L<sub>PyT</sub>) with isodensity value 0.04.

**Table S1:** Frontier molecular orbital composition (%) in the ground state for **2**(L<sub>Me</sub>).

**Table S2:** Frontier molecular orbital composition (%) in the ground state for **2**(L<sub>Et</sub>).

**Table S3:** Frontier molecular orbital composition (%) in the ground state for **2**(L<sub>PyT</sub>).

**Table S4:** Mulliken Atomic Charges for **2**(L<sub>Me</sub>).

**Table S5:** Mulliken Atomic Charges for **2**(L<sub>Et</sub>).

**Table S6:** Mulliken Atomic Charges for **2**(L<sub>PyT</sub>).

**Table S7:** Cartesian coordinates (Å) for DFT energy-minimized model of **2**(L<sub>Me</sub>).

**Table S8:** Cartesian coordinates (Å) for DFT energy-minimized model of **2**(L<sub>Et</sub>).

**Table S9:** Cartesian coordinates (Å) for DFT energy-minimized model of **2**(L<sub>PyT</sub>).

**Table S10:** Summary of X-ray crystallography for **2**(L<sub>Et</sub>).

### MTT assay for cellular viability

The % of viable cells after treatment with ligand  $L_{Et}$  were assessed using the lung cancer cell line A549 and normal peripheral blood mononuclear cells (PBMC) by MTT assay to the desired concentration range ( $10 \mu\text{l} - 60 \mu\text{l}$ ,  $[L_{Et}] = 0.63 \mu\text{M}/10\mu\text{l}$ ). The result of solvent treated set served the standard to distinguish the effect of solvent on the cells in each case. Both the cells were incubated in 96-well microplates for 24h with or without the ligand  $L_{Et}$ . At the end of experimental time interval, MTT assay was performed by dissolving the intracellular formazan crystals formed in dimethyl sulfoxide (DMSO), the absorbance of the solution was measured at 595 nm using a microplate ELISA reader (Thermo Scientific, Multiscan Ex, Electron Corporation, USA). The % cell viability was calculated as:  $\text{O.D of compound treated sample}/\text{O.D of untreated sample} \times 100$ . Additionally, confocal microscopic imaging was also performed using Hoescht dye for counterstaining the nucleus.

### Results

The ligand  $L_{Et}$  was found to be non-toxic to both the normal PBMC and A549 lung cancer cells even after 96 h of incubation. Confocal images of PBMC and A549 cells showed no change in their morphology of cellular and nuclear membrane revealing that the ligand  $L_{Et}$  is non-toxic in nature.

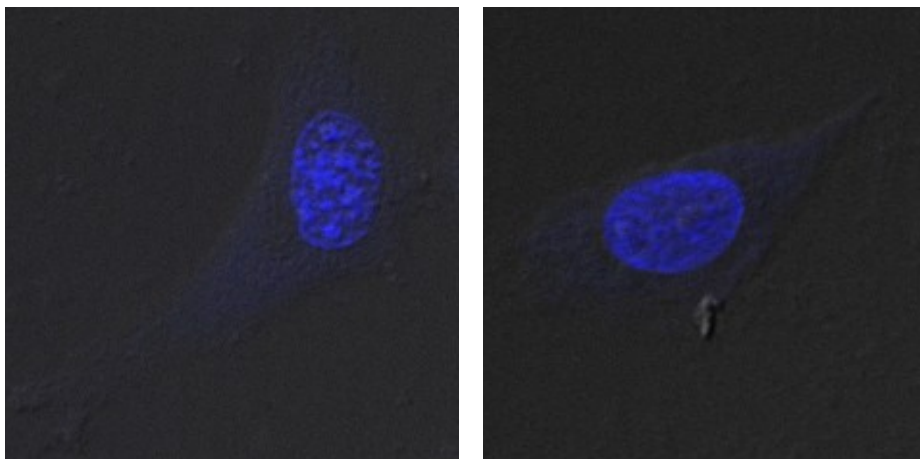

**Confocal microscopic images of PBMC (left) and A549 cell (right) showing no change in their morphology of cellular membrane and nuclear orientation after counterstaining with Hoescht dye**

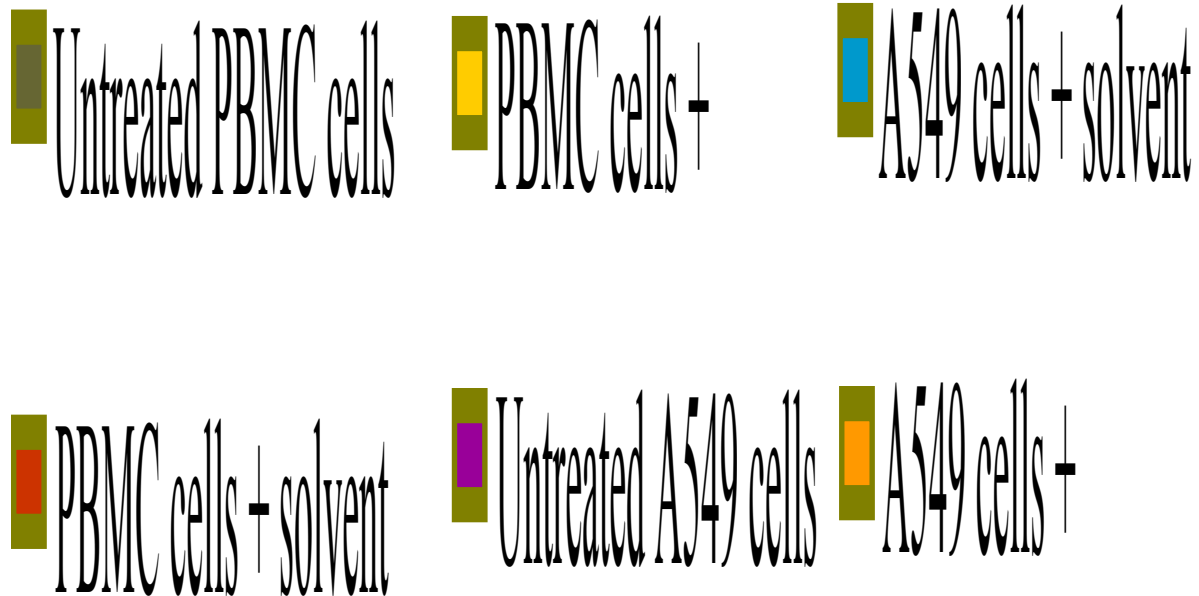

### **Indirect ELISA for quantifying proteins**

The expressions of p53 and caspase 3 proteins were evaluated by using anti-p53 and anti-caspase 3 primary antibodies. The secondary antibodies that were used were of alkaline phosphatase conjugated. The standard protocols of indirect ELISA were adopted for determining any change in the cell cycle and apoptotic proteins p53 and caspase 3. The absorbance values were measured at 405 nm in an ELISA reader (Thermo Multiscan) connected with printer.

**Result:** The treatment of cancer cells A549 with the compound shows a significant increase of both the proteins revealing the ability of the compound to induce cell cycle arrest induced apoptosis of cancer cells.

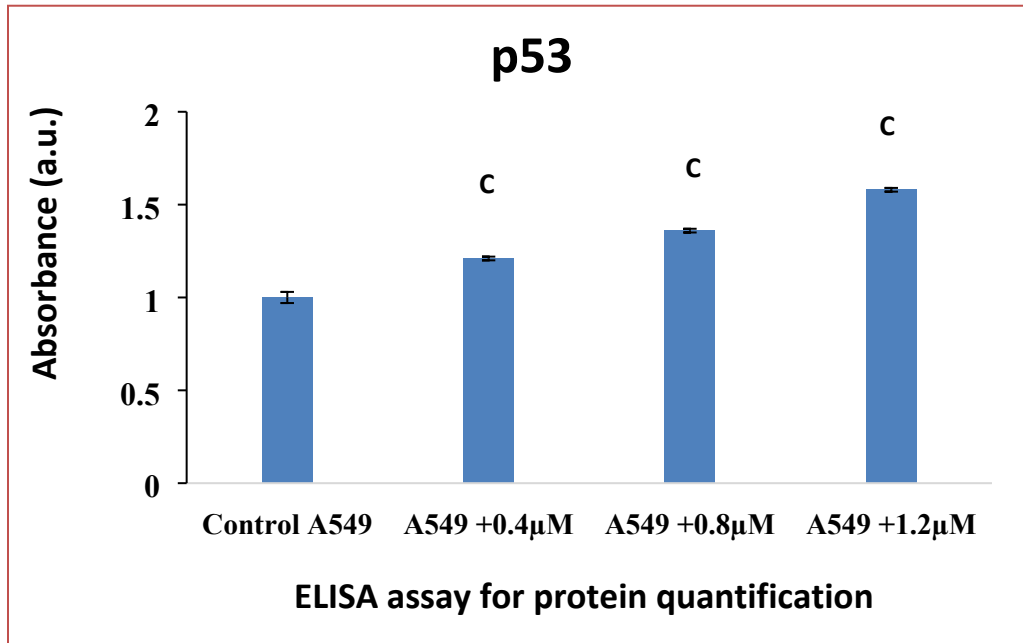

Graphical representation of modulation of cell cycle and apoptotic protein p53 estimated by indirect ELISA.  $^c p < 0.001$  vs control were considered significant for Students' t-test.

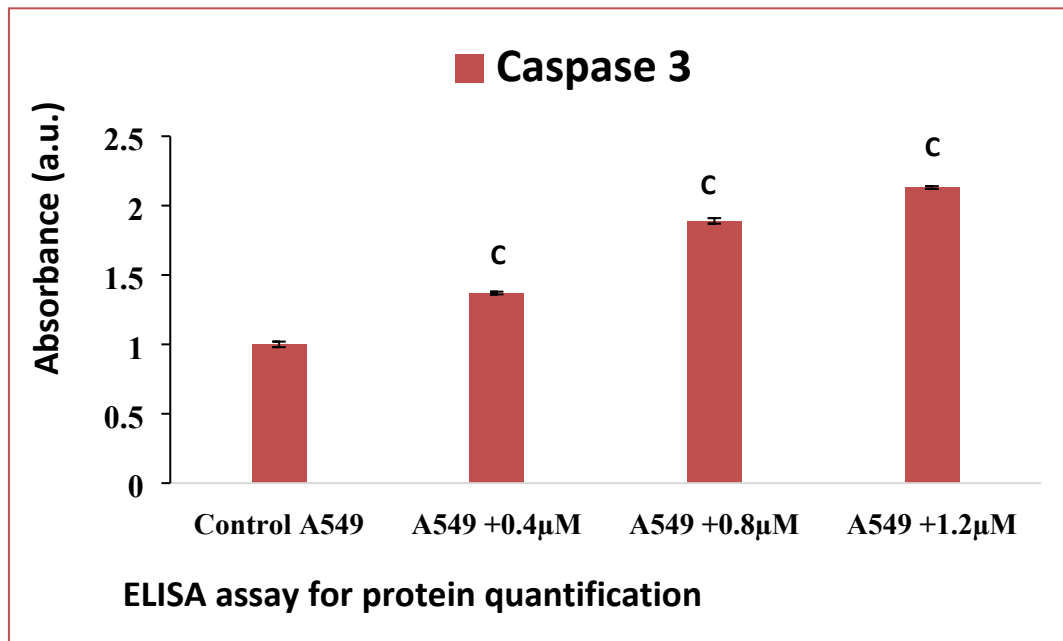

Graphical representation of modulation of cell cycle and apoptotic protein caspase 3 estimated by indirect ELISA.  $^c p < 0.001$  vs control were considered significant for Students' t-test.

## CT–DNA binding studies

CT–DNA binding studies with the complex  $2(L_{Et})$  was carried out by following a reported procedure.<sup>1</sup> The experiments were performed in Tris–HCl buffer (30 mM, pH 7.4). UV contamination. Further, concentration of CT-DNA solution was determined by absorption spectroscopy using the molar extinction coefficient of  $13,600 \text{ M}^{-1}\text{cm}^{-1}$  at 260 nm.<sup>2</sup> Stock solution of the DNA were stored at 4 °C. The titration experiment was carried out by taking a fixed concentration of the complex  $2(L_{Et})$  ( $6.67 \times 10^{-5} \text{ M}$ ) with varying concentration of CT-DNA (0 - 7  $\mu\text{M}$ ) into a rectangular quartz cuvette having the path length of 1 cm. Equal amounts of CT-DNA solution were added to the complex solution and the reference solution to eliminate the absorbance of DNA itself. The reference solution was the same Tris-HCl buffer solution. After addition of DNA to the complex in Tris-HCl buffer, the resulting solution was allowed to equilibrate for 5 min at room temperature. Then, the solution was scanned in the specified wavelength window.

The binding affinity of the complex  $2(L_{Et})$  for CT–DNA was evaluated using absorption measurements. It has been found that when metal complexes intercalate between DNA base pairs then there is generally a small red/blue shift causing a hypochromic effect, while non-intercalating/electrostatic or groove binding interactions give rise to a hyperchromic effect.<sup>3</sup> The UV-Vis spectra obtained during the titration of fixed concentration of  $2(L_{Et})$  in the presence of increasing concentrations of CT-DNA are depicted in the figure below. Upon addition of increasing concentrations of DNA to the complex, the absorption spectra show ‘hyperchromic’ effect with a blue shift of  $\sim 4 \text{ nm}$  of the absorption maximum of the complex. This hyperchromism accompanied by the blue shift is suggested to be generated through the active interactions of the complex with DNA base pairs. Quantitative affinity of the complex  $2(L_{Et})$  for CT-DNA was judged from the intrinsic binding constant ( $K_b$ ) value evaluated by monitoring the changes in absorbance at 400 nm with increasing concentrations of CT-DNA using eqn. (1) where,  $[DNA]$  is the concentration of DNA,  $\epsilon_a$  is the ratio of the absorbance/[complex],  $\epsilon_f$  is the extinction coefficient for free  $2(L_{Et})$ , and  $\epsilon_b$  is the extinction coefficient for metal complex in the fully bound form.

$$[DNA] / (\epsilon_a - \epsilon_f) = [DNA] / (\epsilon_b - \epsilon_f) + 1/K_b (\epsilon_b - \epsilon_f) \dots\dots\dots (1)$$

The value of  $K_b$  evaluated from the ratio of the slope to the intercept in the plot of  $[\text{DNA}]/(\epsilon_a - \epsilon_f)$  vs.  $[\text{DNA}]$  was found to be  $3.445 \times 10^5 \text{ M}^{-1}$ . Binding affinity measurements for CT–DNA with the ligand  $L_{\text{Et}}$  alone did not indicate any significant interactions. The standard Gibb's free energy for DNA binding was calculated from the following relation<sup>4</sup>  $\Delta G^\circ_b = -RT \ln K_b$  and was found to be  $-31.588 \text{ KJ M}^{-1}$ .

1. S., A. Chakraborty, S. P. Dash, A. K. Panda, R. Acharyya, A. Biswas, S. Mukhopadhyay, S. K. Bhutia, A. Crochet, Y. P. Patil, M. Nethaji and R. Dinda, *Dalton Trans.*, 2015, **44**, 6140–6157.
2. D. Sarkar, P. Das, S. Basak and N. Chattopadhyay, *J. Phys. Chem. B*, 2008, **112**, 9243–9249.
3. (a) R.P. Paitandi, R.K. Gupta, R.S. Singh, G. Sharma, B. Koch and D.S. Pandey, *Eur. J. Med. Chem.*, 2014, **84**, 17–29; (b) R.K. Gupta, G. Sharma, R. Pandey, A. Kumar, B. Koch, P.Z. Li, Q. Xu and D.S. Pandey, *Inorg. Chem.*, 2013, **52**, 13984–13996.
4. L. H. Abdel-Rahman, R. M. El-Khatib, L. A.E. Nassr, A. M. Abu-Dief and F. El-Din Lashin, *Spectrochim. Acta Part A: Mol. Biomol. Spectrosc.*, 2013, **111**, 266–276.

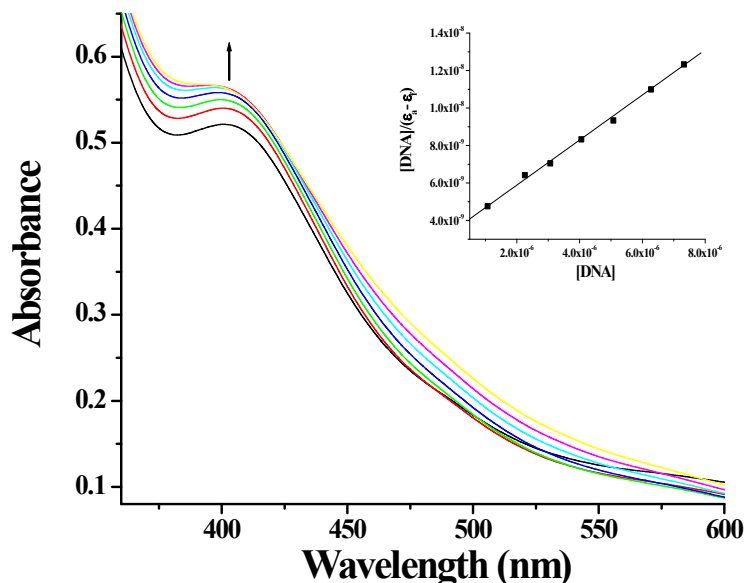

UV-Vis spectra of complex **2**(L<sub>Et</sub>) ( $6.67 \times 10^{-5}$  M, 30 mM Tris-HCl, pH 7.4) after addition of CT-DNA (0-7  $\mu$ M) at 298 K. The arrow shows the direction of change in absorbance. Inset: Plot of  $[\text{DNA}]/(\epsilon_a - \epsilon_f)$  vs  $[\text{DNA}]$ .

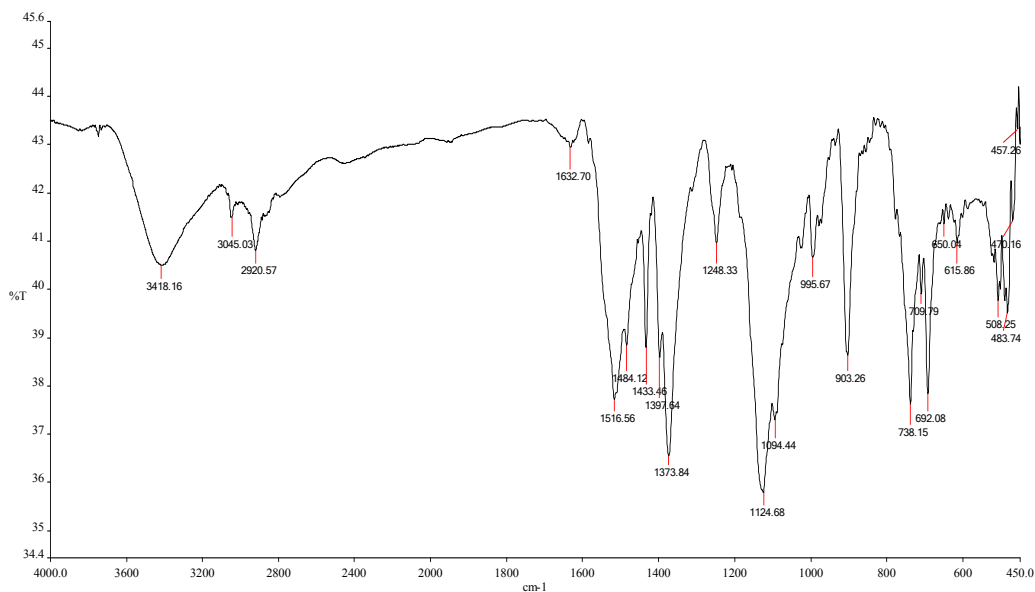

**Fig. S1:** IR spectrum of **2**(L<sub>Me</sub>)

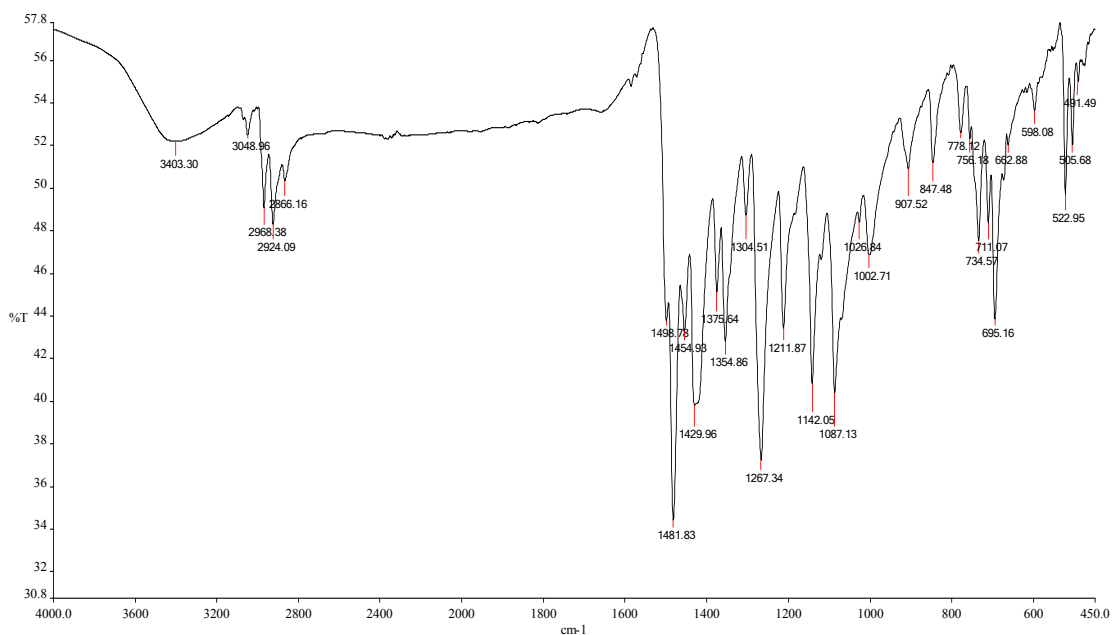

**Fig. S2:** IR spectrum of **2**(L<sub>Et</sub>)



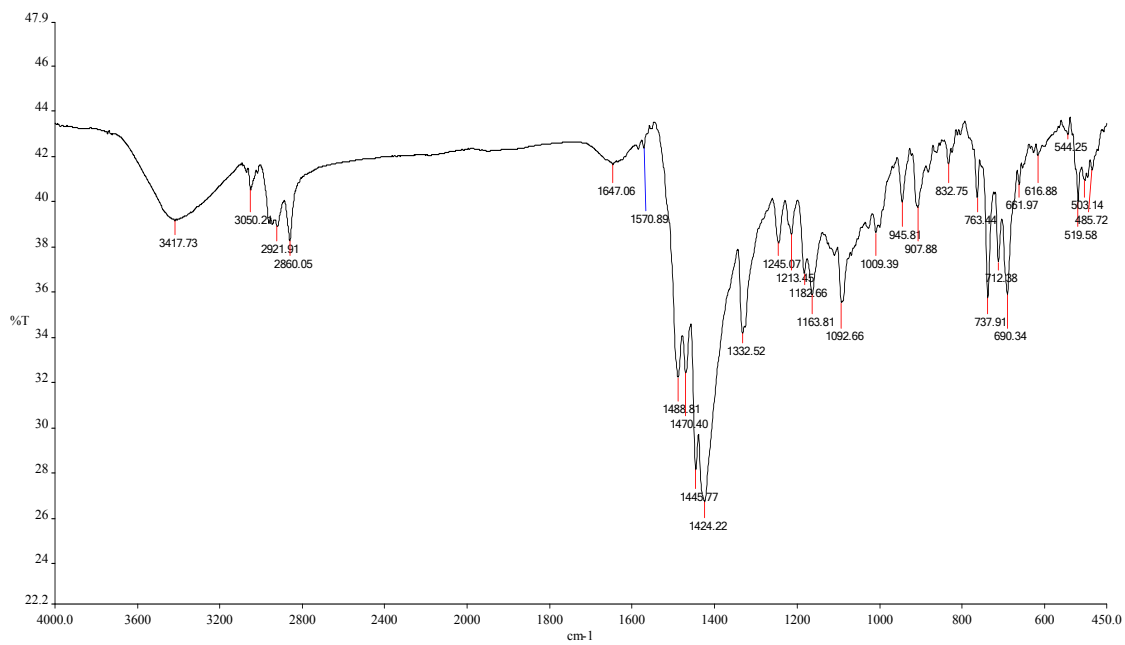

Fig. S3: IR spectrum of 2(L<sub>PyT</sub>)

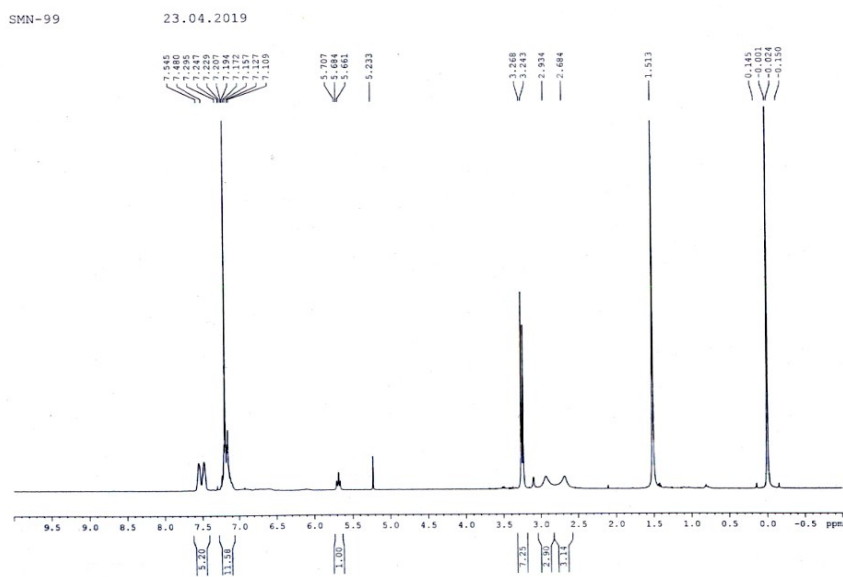

Fig. S4: <sup>1</sup>H NMR spectrum of 2(L<sub>Me</sub>)

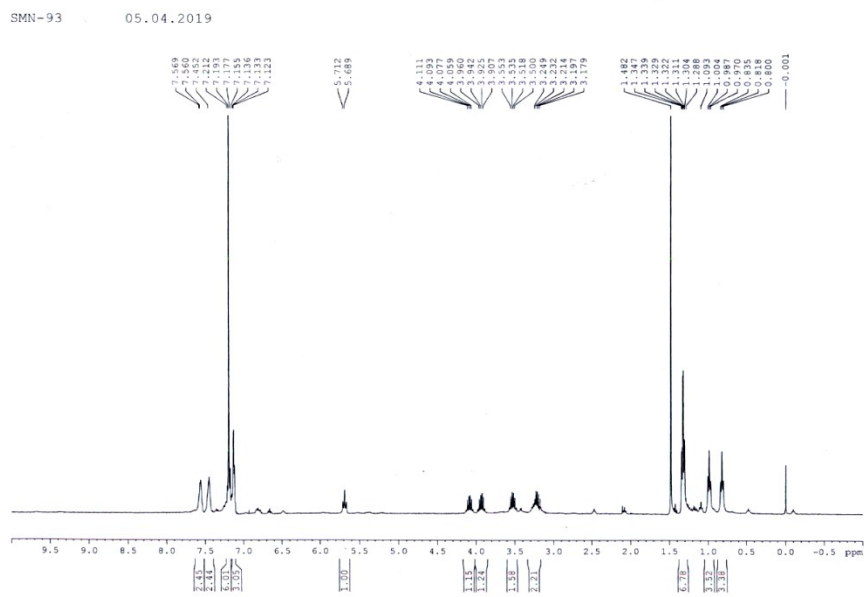

Fig. S5: <sup>1</sup>H NMR spectrum of 2(L<sub>Et</sub>)

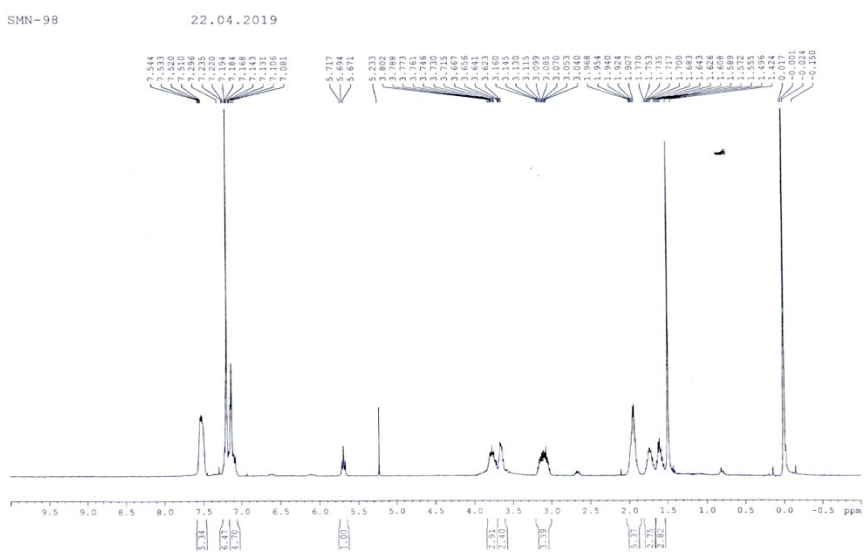

Fig. S6: <sup>1</sup>H NMR spectrum of 2(L<sub>PyT</sub>)

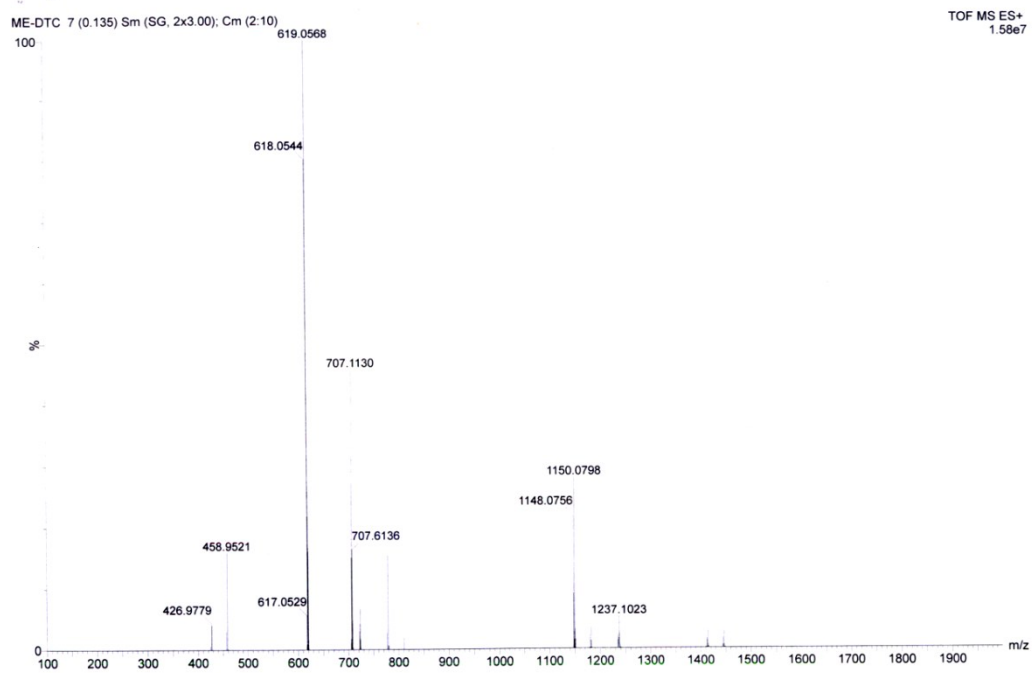

**Fig. S7:** ESI Mass spectrum of **2**(L<sub>Me</sub>)

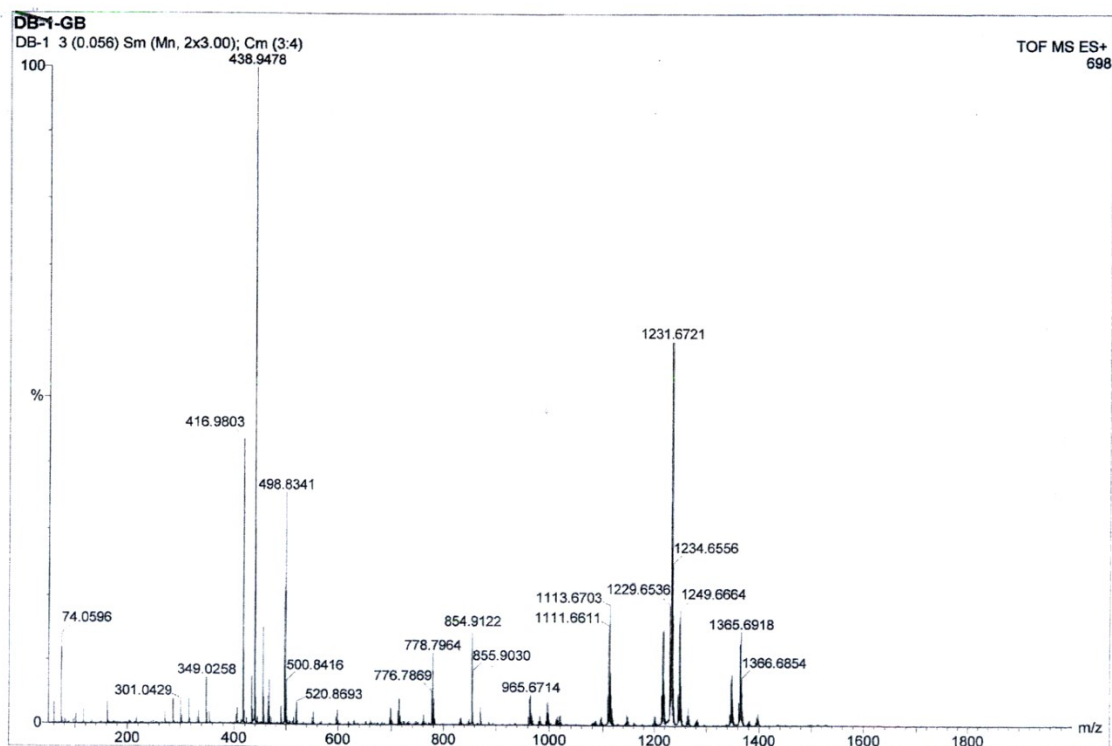

**Fig. S8:** ESI Mass spectrum of **2**(L<sub>Et</sub>)

PYRR-LTC 2 (0.051) Sm (SG, 2x3.00), Cm (2:9)

TOF MS ES+  
4.64e6

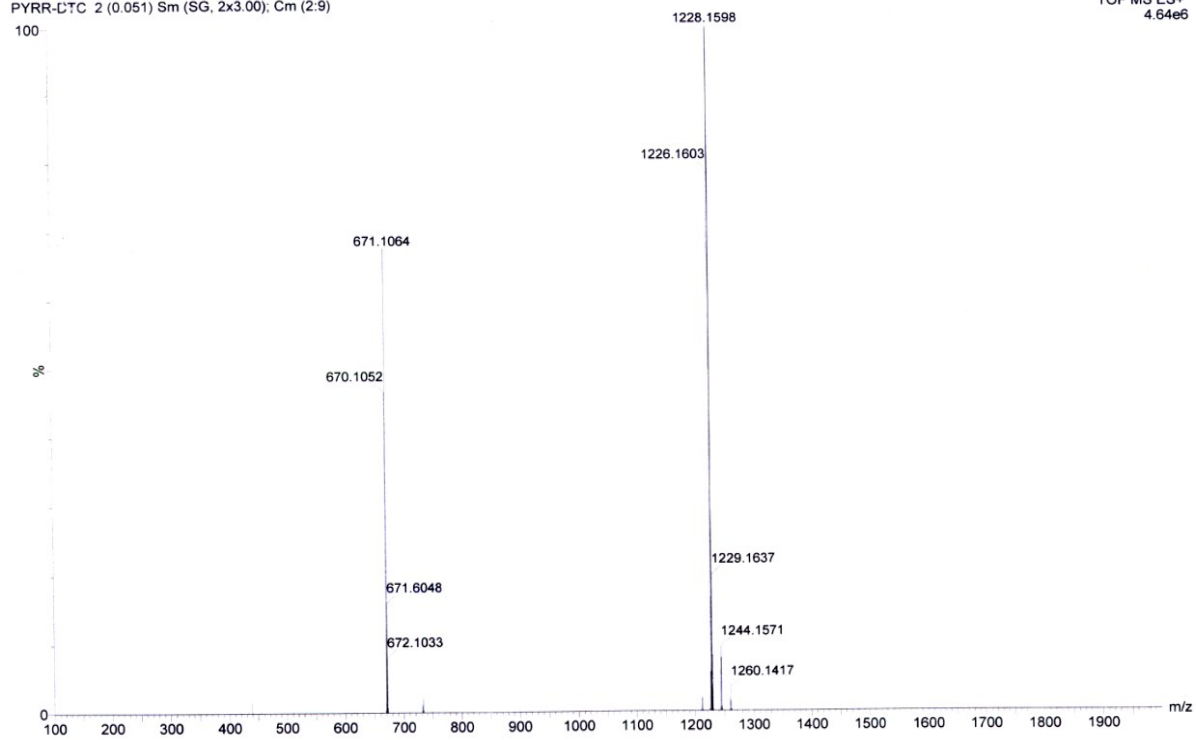

**Fig. S9:** ESI Mass spectrum of **2**(L<sub>pyr</sub>)

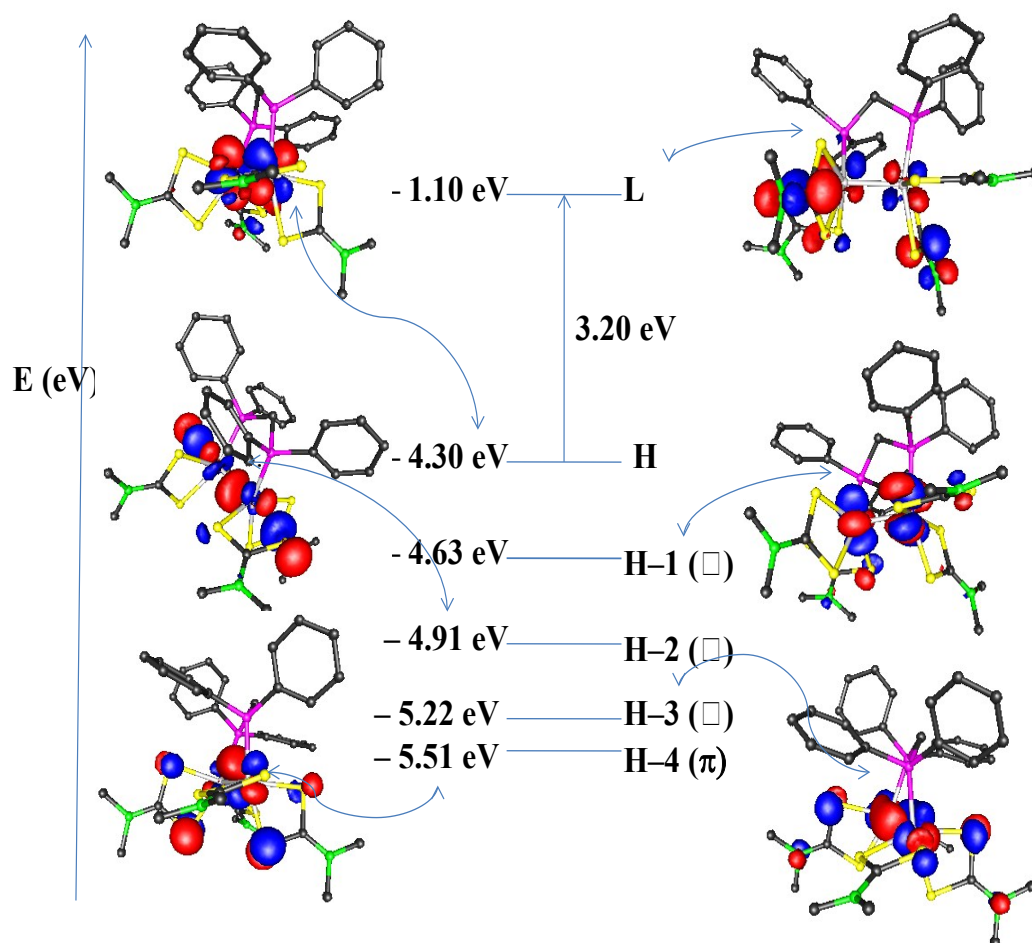

**Fig. 10:** Illustration of the 0.04 contour surface diagrams of five highest occupied and one lowest unoccupied MOs calculated by DFT for  $2(L_{Me})$ .

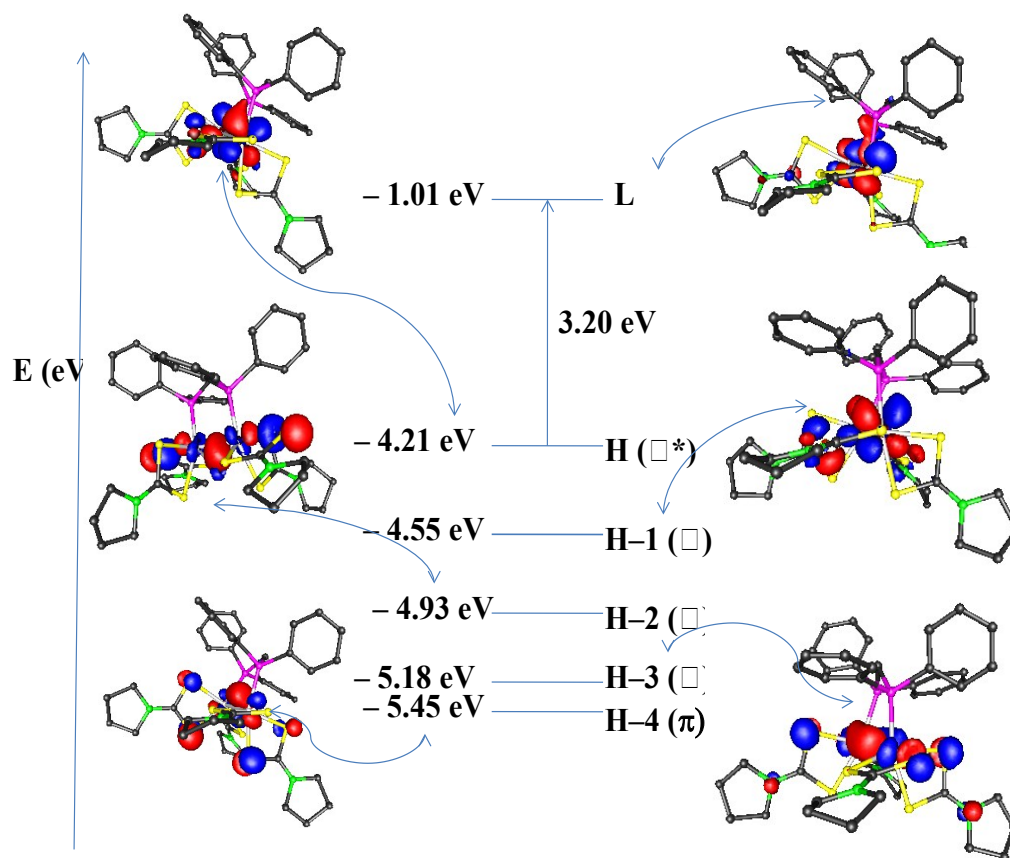

**Fig. 11:** Illustration of the 0.04 contour surface diagrams of five highest occupied and one lowest unoccupied MOs calculated by DFT for **2**(L<sub>pyr</sub>).

## Tables

**Table S1.** Frontier molecular orbital compositions (%) in the ground state for **2**(L<sub>Me</sub>).

| Orbital | Energy | Contribution (%) |
|---------|--------|------------------|
|---------|--------|------------------|



|       | (eV)     | Re   | L <sub>Me</sub> | dppm |
|-------|----------|------|-----------------|------|
| H - 5 | - 5.6332 | 11.2 | 85.5            | 3.3  |
| H - 4 | - 5.5127 | 35.1 | 59.8            | 5.1  |
| H - 3 | - 5.2265 | 42.8 | 56              | 1.2  |
| H - 2 | - 4.9719 | 35.5 | 64.1            | 0.4  |
| H - 1 | - 4.6343 | 51.9 | 39.4            | 8.7  |
| H     | - 4.3038 | 58.7 | 32.9            | 8.4  |
| L     | - 1.1037 | 31.1 | 61.7            | 7.2  |
| L + 1 | - 1.0781 | 45.6 | 37.7            | 16.7 |
| L + 2 | - 0.8725 | 18.6 | 26              | 55.4 |
| L + 3 | - 0.8207 | 8.6  | 50.3            | 41.1 |
| L + 4 | - 0.7337 | 11.4 | 39.4            | 49.2 |
| L + 5 | - 0.5688 | 18.6 | 31.9            | 49.5 |

**Table S2.** Frontier molecular orbital compositions (%) in the ground state for **2**(L<sub>Et</sub>).

| Orbital | Energy<br>(eV) | Contribution (%) |                 |      |
|---------|----------------|------------------|-----------------|------|
|         |                | Re               | L <sub>Et</sub> | dppm |
| H - 5   | - 5.5049       | 14.1             | 83              | 2.9  |
| H - 4   | - 5.3702       | 31.5             | 63              | 5.3  |
| H - 3   | - 5.1950       | 42.7             | 55.9            | 1.4  |
| H - 2   | - 4.8529       | 36.3             | 63              | 0.7  |
| H - 1   | - 4.5110       | 51.2             | 40.3            | 8.5  |
| H       | - 4.1728       | 58.1             | 33.4            | 8.5  |
| L       | - 0.9853       | 27.3             | 61.8            | 10.9 |
| L + 1   | - 0.9694       | 50.6             | 31.2            | 18.2 |
| L + 2   | - 0.8051       | 15.5             | 20.9            | 63.6 |
| L + 3   | - 0.7384       | 10.9             | 33.2            | 55.9 |
| L + 4   | - 0.6451       | 8.4              | 63.9            | 27.7 |
| L + 5   | - 0.4968       | 2.8              | 55.3            | 41.9 |

|       |         |     |      |      |
|-------|---------|-----|------|------|
| L + 7 | -0.4154 | 2.8 | 60.3 | 36.9 |
| L + 9 | -0.3863 | 5.6 | 38.8 | 55.6 |

**Table S3.** Frontier molecular orbital compositions (%) in the ground state for **2**(L<sub>PYR</sub>).

| Orbital | Energy<br>(eV) | Contribution (%) |                  |      |
|---------|----------------|------------------|------------------|------|
|         |                | Re               | L <sub>PYR</sub> | dppm |
| H - 5   | -5.5775        | 12.6             | 84.2             | 3.2  |
| H - 4   | -5.4509        | 32.3             | 62.2             | 5.5  |
| H - 3   | -5.1824        | 42.5             | 56.1             | 1.4  |
| H - 2   | -4.9303        | 35.1             | 64.0             | 0.6  |
| H - 1   | -4.5579        | 51.0             | 40.8             | 8.2  |
| H       | -4.2167        | 58.7             | 33.0             | 8.3  |
| L       | -1.0155        | 57.1             | 21.4             | 21.5 |
| L + 1   | -0.9973        | 23.6             | 71.4             | 5.0  |
| L + 2   | -0.8275        | 15.4             | 16.4             | 68.2 |
| L + 3   | -0.7476        | 10.0             | 27.8             | 62.2 |
| L + 4   | -0.6517        | 9.6              | 66.4             | 24.0 |
| L + 5   | -0.5085        | 8.5              | 15.2             | 76.3 |

**Table S4:** Mulliken Atomic Charges for **2**(L<sub>Me</sub>).

| Atoms | Charges   |
|-------|-----------|
| Re    | 0.078655  |
| Re    | 0.031476  |
| S     | -0.212053 |
| S     | -0.388662 |
| S     | -0.244797 |
| S     | -0.238092 |
| S     | -0.180303 |
| S     | -0.174456 |

|   |           |
|---|-----------|
| S | -0.245493 |
| S | -0.380286 |
| P | 0.276835  |
| P | 0.358948  |

**Table S5:** Mulliken Atomic Charges for **2**(L<sub>Et</sub>).

| Atoms | Charges   |
|-------|-----------|
| Re    | 0.087473  |
| Re    | 0.035147  |
| S     | -0.190583 |
| S     | -0.394446 |
| S     | -0.249968 |
| S     | -0.239337 |
| S     | -0.164246 |
| S     | -0.171701 |
| S     | -0.233487 |
| S     | -0.386045 |
| P     | 0.267346  |
| P     | 0.345154  |

**Table S6:** Mulliken Atomic Charges for **2**(L<sub>PyT</sub>).

| Atoms | Charges   |
|-------|-----------|
| Re    | 0.099371  |
| Re    | 0.013963  |
| S     | -0.199145 |
| S     | -0.397337 |
| S     | -0.242086 |
| S     | -0.243805 |
| S     | -0.180533 |
| S     | -0.181422 |
| S     | -0.250833 |
| S     | -0.388515 |
| P     | 0.277940  |
| P     | 0.362673  |

**Table S7:** Cartesian coordinates (Å) for DFT energy-minimized model of **2**(L<sub>Me</sub>).

| Atoms | x         | y         | z         |
|-------|-----------|-----------|-----------|
| Re    | -0.726750 | -1.033008 | -1.252098 |

|    |           |           |           |
|----|-----------|-----------|-----------|
| Re | 1.051474  | -0.676619 | 0.180217  |
| S  | 3.080444  | -1.143536 | -1.079701 |
| S  | 2.502696  | -0.023285 | 2.521565  |
| S  | -2.745781 | -0.138165 | -0.241501 |
| S  | 1.765559  | -2.974221 | 0.671257  |
| S  | 0.441182  | -2.706668 | -2.616726 |
| S  | -0.316667 | -0.698194 | 2.216458  |
| S  | -1.958676 | -2.879595 | -0.170091 |
| P  | -0.152502 | 0.881889  | -2.538453 |
| P  | 1.125022  | 1.714471  | 0.094592  |
| S  | -2.144514 | -1.780836 | -3.567916 |
| C  | -1.409644 | 1.728288  | -3.624120 |
| N  | -4.417544 | -2.090867 | 0.708362  |
| N  | 0.816202  | -0.335451 | 4.630325  |
| C  | 5.324170  | -3.283826 | -1.302988 |
| H  | 6.282056  | -3.552835 | -0.817494 |
| H  | 5.344866  | -2.215819 | -1.578424 |
| C  | -0.990441 | 2.646355  | -4.614574 |
| H  | 0.081055  | 2.797475  | -4.802077 |
| C  | 3.984623  | 1.981834  | 0.136766  |
| H  | 4.013268  | 0.904030  | 0.336700  |
| C  | -3.203410 | -1.753528 | 0.210549  |
| C  | 2.741715  | 2.627558  | -0.024884 |
| C  | -2.793483 | 1.549189  | -3.411869 |
| H  | -3.140377 | 0.841919  | -2.646863 |

|   |           |           |           |
|---|-----------|-----------|-----------|
| C | 4.202490  | -4.837435 | 0.275825  |
| H | 3.522209  | -4.808118 | 1.144318  |
| H | 5.223085  | -5.087066 | 0.623086  |
| C | -1.745739 | 3.420127  | 2.580943  |
| H | -2.843663 | 3.435348  | 2.626331  |
| C | 0.239421  | 2.324398  | -1.433270 |
| H | -0.741238 | 2.736729  | -1.132803 |
| H | 0.785596  | 3.132737  | -1.955216 |
| C | 1.271567  | 0.773860  | -3.706999 |
| C | -5.387946 | -1.075253 | 1.107630  |
| H | -6.406245 | -1.412089 | 0.834259  |
| H | -5.169101 | -0.128463 | 0.585427  |
| C | 1.095441  | -0.005239 | -4.875715 |
| H | 0.118994  | -0.470896 | -5.070915 |
| C | -3.307438 | 3.174318  | -5.156927 |
| H | -4.043567 | 3.730788  | -5.753917 |
| C | 2.732611  | 4.017779  | -0.294741 |
| H | 1.777501  | 4.551883  | -0.395834 |
| C | 2.528668  | 1.369531  | -3.471351 |
| H | 2.703558  | 1.971501  | -2.570607 |
| C | 1.863422  | 0.139077  | 5.528584  |
| H | 1.818624  | -0.429288 | 6.477190  |
| H | 2.848171  | -0.015804 | 5.055283  |
| C | -0.986043 | 4.083087  | 3.561103  |
| H | -1.485099 | 4.631155  | 4.372712  |

|   |           |           |           |
|---|-----------|-----------|-----------|
| C | 5.167305  | 4.080031  | -0.255041 |
| H | 6.107680  | 4.641489  | -0.345738 |
| C | 5.188072  | 2.702777  | 0.022559  |
| H | 6.145646  | 2.179827  | 0.152607  |
| H | -5.352809 | -0.895734 | 2.203119  |
| H | 3.856957  | -5.630089 | -0.421232 |
| H | 5.209995  | -3.887546 | -2.228125 |
| H | -2.078815 | -5.038934 | -5.926682 |
| C | -4.719152 | -3.468678 | 1.089229  |
| H | -4.113426 | -4.161480 | 0.479806  |
| H | -5.792319 | -3.668307 | 0.909149  |
| C | 3.933006  | 4.737551  | -0.412614 |
| H | 3.903092  | 5.815766  | -0.623338 |
| C | 3.583952  | 1.201657  | -4.387783 |
| H | 4.554214  | 1.676489  | -4.186327 |
| C | -1.840976 | -3.977613 | -5.719206 |
| H | -1.486567 | -3.501622 | -6.659668 |
| H | -2.754749 | -3.455513 | -5.387278 |
| C | -3.734207 | 2.266465  | -4.172021 |
| H | -4.807142 | 2.106349  | -3.996146 |
| C | 3.396334  | 0.437142  | -5.551325 |
| H | 4.218871  | 0.311232  | -6.269396 |
| C | 0.990642  | -0.342378 | 3.274948  |
| C | 2.147121  | -0.165672 | -5.791728 |
| H | 1.990009  | -0.764171 | -6.700233 |

|   |           |           |           |
|---|-----------|-----------|-----------|
| C | -1.931055 | 3.362608  | -5.375010 |
| H | -1.584455 | 4.068542  | -6.143003 |
| C | 0.418153  | 4.034739  | 3.496558  |
| H | 1.024151  | 4.542884  | 4.260079  |
| H | 1.166417  | -4.231925 | -5.343557 |
| H | -1.126859 | 0.423083  | 5.096026  |
| H | -4.494908 | -3.649544 | 2.161749  |
| C | -0.519530 | -0.502034 | 5.196079  |
| H | -1.049046 | -1.320802 | 4.674761  |
| H | -0.426550 | -0.758606 | 6.266891  |
| H | 1.748406  | 1.222094  | 5.751953  |
| N | -0.835523 | -3.900789 | -4.665312 |
| C | -0.854981 | -2.903246 | -3.728332 |
| C | 3.162608  | -2.690135 | -0.298930 |
| N | 4.223110  | -3.530543 | -0.375778 |
| C | 0.342256  | -4.750797 | -4.807612 |
| H | 0.063811  | -5.659222 | -5.372107 |
| H | 0.714851  | -5.046058 | -3.809248 |
| C | -1.105814 | 2.726274  | 1.539461  |
| H | -1.720704 | 2.185945  | 0.806771  |
| C | 1.057303  | 3.344268  | 2.451245  |
| H | 2.153251  | 3.310445  | 2.418139  |
| C | 0.303451  | 2.697557  | 1.446232  |

---

**Table S8:** Cartesian coordinates (Å) for DFT energy-minimized model of **2**(L<sub>Et</sub>).

| Atoms | x         | y         | z         |
|-------|-----------|-----------|-----------|
| Re    | 8.331601  | 6.794465  | 5.088970  |
| Re    | 10.128647 | 7.161095  | 6.496471  |
| S     | 12.144224 | 6.700746  | 5.214419  |
| S     | 11.611391 | 7.815339  | 8.816941  |
| S     | 6.322555  | 7.676040  | 6.126732  |
| S     | 10.854326 | 4.866089  | 6.981205  |
| S     | 9.486302  | 5.124914  | 3.699834  |
| S     | 8.795068  | 7.118942  | 8.558178  |
| S     | 7.129905  | 4.939924  | 6.188622  |
| P     | 8.878019  | 8.705454  | 3.786318  |
| P     | 10.193535 | 9.551285  | 6.397943  |
| S     | 6.871088  | 6.029363  | 2.809750  |
| C     | 7.600346  | 9.546657  | 2.720426  |
| N     | 4.672972  | 5.713225  | 7.094011  |
| N     | 10.008781 | 7.358469  | 10.960851 |
| C     | 14.455279 | 4.669318  | 5.052976  |
| H     | 15.348153 | 4.181621  | 5.489910  |
| H     | 14.607734 | 5.763886  | 5.125376  |
| C     | 8.000312  | 10.466125 | 1.723190  |
| H     | 9.068115  | 10.621413 | 1.518815  |
| C     | 13.052945 | 9.825046  | 6.416608  |
| H     | 13.084730 | 8.750093  | 6.630323  |
| C     | 5.879355  | 6.057120  | 6.587068  |



|   |           |           |           |
|---|-----------|-----------|-----------|
| C | 11.807768 | 10.466368 | 6.254407  |
| C | 6.220828  | 9.362456  | 2.954651  |
| H | 5.889387  | 8.654683  | 3.725947  |
| C | 13.327505 | 3.056284  | 6.663111  |
| H | 12.799928 | 3.231849  | 7.620598  |
| H | 14.385245 | 2.834410  | 6.905128  |
| C | 7.338989  | 11.276125 | 8.887368  |
| H | 6.241550  | 11.280999 | 8.945531  |
| C | 9.290260  | 10.153337 | 4.876501  |
| H | 8.316087  | 10.573098 | 5.187355  |
| H | 9.833380  | 10.954668 | 4.340878  |
| C | 10.279755 | 8.595877  | 2.590198  |
| C | 3.662302  | 6.745052  | 7.385723  |
| H | 2.669396  | 6.270958  | 7.260660  |
| H | 3.755219  | 7.524701  | 6.605085  |
| C | 10.081013 | 7.822234  | 1.421628  |
| H | 9.100573  | 7.358962  | 1.241389  |
| C | 5.673061  | 10.984790 | 1.217252  |
| H | 4.925477  | 11.538177 | 0.631716  |
| C | 11.795331 | 11.853002 | 5.966273  |
| H | 10.838995 | 12.384760 | 5.864640  |
| C | 11.542972 | 9.186090  | 2.806413  |
| H | 11.735367 | 9.783148  | 3.706920  |
| C | 11.168652 | 7.586931  | 11.835867 |
| H | 11.055683 | 6.912894  | 12.708751 |

|   |           |           |           |
|---|-----------|-----------|-----------|
| H | 12.066988 | 7.262625  | 11.276928 |
| C | 8.102596  | 11.978005 | 9.837134  |
| H | 7.606907  | 12.543475 | 10.638645 |
| C | 14.230146 | 11.919387 | 5.989128  |
| H | 15.169068 | 12.480921 | 5.884809  |
| C | 14.254592 | 10.546051 | 6.284997  |
| H | 15.213757 | 10.026163 | 6.415765  |
| C | 3.788279  | 7.382788  | 8.776771  |
| H | 3.627273  | 6.646537  | 9.586380  |
| H | 3.031060  | 8.183434  | 8.891137  |
| H | 4.788595  | 7.835047  | 8.910421  |
| C | 4.369083  | 4.302865  | 7.396991  |
| H | 4.850367  | 3.689702  | 6.610384  |
| H | 3.273878  | 4.177995  | 7.291144  |
| C | 12.993801 | 12.572894 | 5.830972  |
| H | 12.960837 | 13.648177 | 5.606131  |
| C | 12.581432 | 9.019904  | 1.870631  |
| H | 13.556554 | 9.490763  | 2.057321  |
| C | 7.036156  | 3.767841  | 0.736647  |
| H | 7.453171  | 3.428710  | -0.233108 |
| H | 6.583858  | 4.763498  | 0.572479  |
| C | 5.265450  | 10.075840 | 2.209186  |
| H | 4.196016  | 9.912026  | 2.402244  |
| C | 12.370820 | 8.262168  | 0.706572  |
| H | 13.179610 | 8.138380  | -0.027297 |

|   |           |           |           |
|---|-----------|-----------|-----------|
| C | 10.127411 | 7.438672  | 9.602624  |
| C | 11.115641 | 7.663722  | 0.485708  |
| H | 10.939364 | 7.072232  | -0.423798 |
| C | 7.045102  | 11.178396 | 0.977381  |
| H | 7.376709  | 11.885502 | 0.203872  |
| C | 9.505989  | 11.944688 | 9.756041  |
| H | 10.114752 | 12.481662 | 10.497168 |
| C | 5.974218  | 2.783666  | 1.246506  |
| H | 6.400194  | 1.777693  | 1.430068  |
| H | 5.161583  | 2.676442  | 0.500906  |
| H | 5.531796  | 3.152680  | 2.190490  |
| C | 7.788553  | 8.246008  | 11.794568 |
| H | 8.215465  | 8.969742  | 12.513734 |
| H | 6.812131  | 7.905174  | 12.193096 |
| H | 7.605416  | 8.774529  | 10.840624 |
| C | 8.713090  | 7.037988  | 11.579389 |
| H | 8.211297  | 6.293974  | 10.928929 |
| H | 8.928214  | 6.537807  | 12.544050 |
| C | 4.838416  | 3.834533  | 8.782043  |
| H | 5.929502  | 3.976069  | 8.893623  |
| H | 4.619277  | 2.755622  | 8.905252  |
| H | 4.328889  | 4.379621  | 9.598639  |
| C | 12.681504 | 1.878254  | 5.919503  |
| H | 11.632286 | 2.110022  | 5.657693  |
| H | 12.682009 | 0.980513  | 6.568632  |

|   |           |           |           |
|---|-----------|-----------|-----------|
| H | 13.226879 | 1.625353  | 4.990854  |
| C | 11.347815 | 9.040193  | 12.298047 |
| H | 11.437126 | 9.713953  | 11.425913 |
| H | 12.273313 | 9.131549  | 12.900925 |
| H | 10.501836 | 9.386787  | 12.921143 |
| N | 8.163267  | 3.934559  | 1.665572  |
| C | 8.166608  | 4.917134  | 2.613352  |
| C | 12.243977 | 5.155036  | 5.998201  |
| C | 14.280957 | 4.266266  | 3.581666  |
| H | 14.191115 | 3.170424  | 3.460983  |
| H | 15.159396 | 4.602432  | 2.996261  |
| H | 13.381353 | 4.742323  | 3.149422  |
| N | 13.312594 | 4.328486  | 5.919673  |
| C | 9.275981  | 2.983250  | 1.544324  |
| H | 8.847841  | 2.009509  | 1.232381  |
| H | 9.710138  | 2.838629  | 2.552170  |
| C | 10.360522 | 3.436955  | 0.556631  |
| H | 9.950821  | 3.574287  | -0.463379 |
| H | 11.166766 | 2.679158  | 0.497173  |
| H | 10.808942 | 4.393578  | 0.884081  |
| C | 7.974441  | 10.559857 | 7.858287  |
| H | 7.358099  | 9.991669  | 7.148123  |
| C | 10.140716 | 11.231453 | 8.723348  |
| H | 11.236612 | 11.212488 | 8.675417  |
| C | 9.382871  | 10.547035 | 7.747099  |

---

**Table S9:** Cartesian coordinates (Å) for DFT energy-minimized model of **2**(L<sub>PyT</sub>).

| Atoms | x         | y         | z         |
|-------|-----------|-----------|-----------|
| Re    | -0.565715 | -0.429914 | -1.188432 |
| Re    | 1.210528  | -0.034358 | 0.227504  |
| S     | 3.243736  | -0.508326 | -1.033689 |
| S     | 2.698811  | 0.687305  | 2.561170  |
| S     | -2.593694 | 0.462561  | -0.180700 |
| S     | 1.942845  | -2.323207 | 0.766778  |
| S     | 0.601496  | -2.120472 | -2.540381 |
| S     | -0.131212 | -0.041095 | 2.285128  |
| S     | -1.772789 | -2.282486 | -0.071265 |
| P     | -0.018599 | 1.464706  | -2.510086 |
| P     | 1.269233  | 2.352492  | 0.099821  |
| S     | -2.025022 | -1.242902 | -3.484230 |
| C     | -1.287587 | 2.283296  | -3.604006 |
| N     | -4.197089 | -1.484028 | 0.842328  |
| N     | 1.009252  | 0.488146  | 4.648698  |
| C     | 5.529779  | -2.637200 | -1.196669 |
| C     | 6.263208  | -3.989943 | -1.196252 |
| H     | 6.147449  | -1.823516 | -0.760230 |
| C     | -0.880527 | 3.184557  | -4.614737 |
| H     | 0.188802  | 3.338144  | -4.812344 |
| C     | 4.126894  | 2.646552  | 0.108310  |

|   |           |           |           |
|---|-----------|-----------|-----------|
| H | 4.166639  | 1.572999  | 0.328058  |
| C | -3.011373 | -1.150368 | 0.307645  |
| C | 2.876663  | 3.278465  | -0.051239 |
| C | -2.668833 | 2.100551  | -3.378766 |
| H | -3.005564 | 1.405293  | -2.598426 |
| C | 4.454120  | -4.162040 | 0.398975  |
| H | 4.179641  | -4.007728 | 1.459889  |
| C | 5.918482  | -4.583180 | 0.185416  |
| C | -1.598408 | 4.070584  | 2.580140  |
| H | -2.695900 | 4.067792  | 2.638190  |
| C | 0.366208  | 2.929274  | -1.431415 |
| H | -0.616420 | 3.336245  | -1.130089 |
| H | 0.900478  | 3.734673  | -1.970037 |
| C | 1.400022  | 1.348733  | -3.685120 |
| C | -5.281798 | -0.521525 | 1.112550  |
| C | -6.499116 | -1.425265 | 1.373046  |
| H | -5.404134 | 0.161940  | 0.250944  |
| C | 1.225993  | 0.541540  | -4.834866 |
| H | 0.253779  | 0.060949  | -5.014065 |
| C | -3.204168 | 3.689195  | -5.150946 |
| H | -3.947558 | 4.230099  | -5.753318 |
| C | 2.852739  | 4.663282  | -0.346691 |
| H | 1.891917  | 5.187174  | -0.447273 |
| C | 2.652403  | 1.961717  | -3.469662 |
| H | 2.825905  | 2.584712  | -2.583110 |

|   |           |           |           |
|---|-----------|-----------|-----------|
| C | 2.087913  | 0.823071  | 5.593092  |
| H | 2.359573  | 1.896234  | 5.494923  |
| H | 2.995189  | 0.234349  | 5.359503  |
| C | -0.839167 | 4.772089  | 3.533532  |
| H | -1.338451 | 5.332728  | 4.336477  |
| C | 5.287079  | 4.747160  | -0.335447 |
| H | 6.221524  | 5.314793  | -0.447146 |
| C | 5.322645  | 3.375397  | -0.033043 |
| H | 6.286081  | 2.862806  | 0.095271  |
| H | -5.024207 | 0.098556  | 1.997553  |
| H | -0.682958 | 0.289762  | 7.493171  |
| C | -4.563575 | -2.866691 | 1.206588  |
| H | -4.699904 | -3.469757 | 0.284016  |
| C | -5.874858 | -2.692369 | 1.993068  |
| C | 4.045447  | 5.391112  | -0.491055 |
| H | 4.003764  | 6.464997  | -0.721243 |
| C | 3.704781  | 1.783513  | -4.387467 |
| H | 4.671532  | 2.271577  | -4.201279 |
| C | -1.750597 | -3.525715 | -5.561551 |
| C | -1.129403 | -4.530162 | -6.548058 |
| H | -2.055040 | -2.569235 | -6.026986 |
| C | -3.618812 | 2.798143  | -4.145671 |
| H | -4.689636 | 2.635737  | -3.959007 |
| C | 3.518880  | 0.991106  | -5.532531 |
| H | 4.339250  | 0.856614  | -6.251631 |

|   |           |           |           |
|---|-----------|-----------|-----------|
| C | 1.180965  | 0.393479  | 3.309073  |
| C | 2.274465  | 0.370794  | -5.752642 |
| H | 2.118728  | -0.250445 | -6.646024 |
| C | -1.830438 | 3.880716  | -5.382381 |
| H | -1.493174 | 4.573737  | -6.166177 |
| C | 0.564809  | 4.746039  | 3.453491  |
| H | 1.170698  | 5.283768  | 4.196657  |
| H | -2.647140 | -3.937578 | -5.049310 |
| C | 1.468506  | 0.504326  | 6.964916  |
| H | -1.078317 | 0.855328  | 4.785220  |
| H | -3.749312 | -3.334946 | 1.791555  |
| H | -0.226815 | 1.878284  | 6.813560  |
| H | -6.527997 | -3.581276 | 1.920425  |
| H | 1.915552  | 1.105074  | 7.778686  |
| H | 1.624586  | -0.564826 | 7.213630  |
| C | -0.287518 | 0.291356  | 5.317381  |
| H | -0.570850 | -0.783466 | 5.287482  |
| C | -0.032196 | 0.788831  | 6.751218  |
| H | 0.637294  | -5.850634 | -6.250099 |
| H | -5.655786 | -2.525508 | 3.066799  |
| H | -6.999773 | -1.672913 | 0.415669  |
| H | -7.248457 | -0.942452 | 2.026960  |
| H | 3.738713  | -4.897073 | -0.027353 |
| H | 5.203226  | -2.304345 | -2.200030 |
| H | 1.327842  | -3.774021 | -5.134988 |



|   |           |           |           |
|---|-----------|-----------|-----------|
| H | 5.864993  | -4.638016 | -2.002585 |
| H | -0.698103 | -6.104280 | -5.091113 |
| H | -1.891316 | -5.160699 | -7.042835 |
| H | -0.576084 | -3.990131 | -7.342808 |
| N | -0.672236 | -3.298559 | -4.584495 |
| C | -0.704223 | -2.325711 | -3.639939 |
| C | 3.316608  | -2.043663 | -0.235142 |
| H | 7.350130  | -3.878121 | -1.364487 |
| H | 6.051826  | -5.679513 | 0.235330  |
| H | 6.561407  | -4.132278 | 0.967725  |
| N | 4.356791  | -2.887037 | -0.336977 |
| C | 0.425156  | -4.270684 | -4.716515 |
| C | -0.149332 | -5.333814 | -5.669413 |
| H | 0.702953  | -4.666781 | -3.719945 |
| C | -0.958494 | 3.361172  | 1.549119  |
| H | -1.571780 | 2.790359  | 0.838480  |
| C | 1.203845  | 4.040009  | 2.418512  |
| H | 2.299784  | 4.023621  | 2.373343  |
| C | 0.449898  | 3.355436  | 1.439003  |

---

**Table S10:** Summary of X-ray crystallography for **2**(L<sub>Et</sub>)

|                   |                                                                                              |
|-------------------|----------------------------------------------------------------------------------------------|
| Empirical formula | C <sub>45</sub> H <sub>62</sub> N <sub>4</sub> P <sub>2</sub> Re <sub>2</sub> S <sub>8</sub> |
|-------------------|----------------------------------------------------------------------------------------------|

---

---

|                                           |                                                   |
|-------------------------------------------|---------------------------------------------------|
| Formula weight                            | 1349.80                                           |
| Crystal system                            | Triclinic                                         |
| Space group                               | P-1                                               |
| a/Å                                       | 10.972(3)                                         |
| b/Å                                       | 11.579(3)                                         |
| c/Å                                       | 22.431(6)                                         |
| $\alpha$ /°                               | 85.129(7)                                         |
| $\beta$ /°                                | 78.968(7)                                         |
| $\gamma$ /°                               | 68.600(6)                                         |
| Volume/Å <sup>3</sup>                     | 2603.9(11)                                        |
| Z                                         | 2                                                 |
| $\mu$ /mm <sup>-1</sup>                   | 5.063                                             |
| Reflections collected                     | 28348                                             |
| Independent reflections                   | 11126                                             |
| Goodness-of-fit on F <sup>2</sup>         | 0.876                                             |
| Final R indexes [I $\geq$ 2 $\sigma$ (I)] | R <sub>1</sub> = 0.0594, wR <sub>2</sub> = 0.0872 |

---
